# Supplementary material
Source: PubMed Central journal article supplement (PMC5663359)
Supplement: jci-127-90387-s001.pdf [file jci-127-90387-s001.pdf]

| Functional Panel |                          |          |                    |               |
|------------------|--------------------------|----------|--------------------|---------------|
| Tag              | Antibody                 | Clone    | Source             | Clustering    |
| 89 Y             | CD45                     | HI30     | DVS Sciences       |               |
| 141 Pr           | CD14                     | M5E2     | BD Pharmingen      |               |
| 142 Nd           | CD19                     | HIB19    | DVS Sciences       |               |
| 143 Nd           | KIR3DS1/L1 (CD158e1, e2) | Z27      | R&D                | Figure 3A,B   |
| 144 Nd           | CD3                      | UCHT1    | DVS Sciences       |               |
| 145 Nd           | KIR2DS4 (CD158i)         | FES172   | Beckman Coulter    | Figure 3A, B  |
| 146 Nd           | KIR2DL1/DS1 (CD158a,h)   | EB6B     | Beckman Coulter    | Figure 3A, B  |
| 147 Sm           | NKG2D                    | 1D11     | R&D                |               |
| 148 Nd           | KIR2DL2/2DL3 (CD158b)    | CH-L     | BD Pharmingen      | Figure 3A, B  |
| 149 Sm           | MIP-1a                   | 93342    | R&D                |               |
| 151 Eu           | CD107a                   | H4A3     | DVS Sciences       |               |
| 152 Dy           | TNF                      | Mab11    | DVS Sciences       |               |
| 153 Eu           | CD62L                    | DREG-56  | DVS Sciences       |               |
| 154 Sm           | KIR2DL5 (CD158f)         | UP-R1    | Beckman Coulter    | Figure 3A, B  |
| 155 Gd           | CD27                     | L128     | DVS Sciences       |               |
| 156 Gd           | KIR3DL1 (CD158e)         | DX9      | R&D                | Figure 3A, B* |
| 158 Gd           | CD137                    | 4B4-1    | DVS Sciences       |               |
| 159 Tb           | NKG2C                    | 134591   | R&D                |               |
| 160 Gd           | CD69                     | FN50     | Biolegend          |               |
| 161 Dy           | NKp30                    | P30-15   | Biolegend          |               |
| 163 Er           | CD94                     | DX22     | Biolegend          |               |
| 165 Ho           | CD16                     | 3G8      | DVS Sciences       |               |
| 166 Er           | NKG2A                    | Z199     | Beckman Coulter    | Figure 3A, B  |
| 167 Dy           | NKp44                    | P44-8    | Biolegend          |               |
| 168 Er           | IFN-g                    | B27      | DVS Sciences       |               |
| 169 Tm           | CD25                     | 2A3      | DVS Sciences       |               |
| 170 Er           | NKp80                    | 239127   | R&D                |               |
| 171 Yb           | Granzyme B               | GB11     | DVS Sciences       |               |
| 172 Yb           | CD57                     | HCD57    | DVS Sciences       | Figure 3A, B  |
| 174 Yb           | NKp46                    | 557911   | R&D                |               |
| 175 Lu           | Perforin                 | B-D48    | DVS Sciences       |               |
| 176 Yb           | CD56                     | NCAM16.2 | DVS Sciences       | Figure 3A, B  |
| 209 Bi           | CD11b                    | ICRF44   | DVS Sciences       |               |
|                  | Cisplatinium             |          | Enzo Life Sciences |               |
|                  | Cell-ID intercalator-Ir  |          | Fluidigm           |               |

**Supplemental Table 1. NK cell mass cytometry panel design, reagents, and clustering usage.** The metal isotope tag, maker name, antibody clone, source, and clustering usage is shown for a panel designed to deeply phenotype human NK cells. Clustering demarcates which channels were used for analysis in the indicated figure except KIR3DL1 (\*) which was not used for donors 6-8.

| Age (y) | WBC (k/ $\mu$ L) | Blast % | Lymph % | NK % | WHO         | Cyto / FISH              | Immunophenotype               | FLT3 / NPM1 | Figure           | HLA-E % + | HLA-A/B/C % + | Figure Symbol |
|---------|------------------|---------|---------|------|-------------|--------------------------|-------------------------------|-------------|------------------|-----------|---------------|---------------|
| 40      | 2.2              | <1%     | 78      | 19   | APL         | t(15:17) / PML-RARA      | CD34-33+117+13+HLA-DR-19-56-  | No/No       | S Fig 7A         | NA        | NA            | ○             |
| 60      | 1.1              | <1%     | 37      | 11   | APL         | t(15:17) / PML-RARA      | CD34-33+117+13+HLA-DR-19p+56- | No/No       | S Fig 7A         | NA        | NA            | ⊠             |
| 76      | 48.7             | 98      | NA      | NA   | AML M1      | Normal / Neg             | CD34-33-117+13-19-56+         | ND/ND       | Fig 6A           | 4         | 37            | NA            |
| 47      | 65.8             | 70      | 15      | NA   | AML t(9;11) | t(9;11) / 11q23 abnl, +8 | CD34-33+117+13-HLA-DR+19-56p+ | D835/No     | Fig 6A           | 94        | 100           | NA            |
| 71      | 60               | NA      | NA      | NA   | AML M2      | ND / Neg                 | CD34+33+117+13+HLA-DR+19-56-  | No/Yes      | Fig 6A           | 78        | 99            | NA            |
| 47      | 49.8             | 45      | 13      | NA   | AML M2      | Normal / Neg             | CD34-33+117+13+HLA-DR+19-56-  | D835/Yes    | Fig 6A           | 39        | 92            | NA            |
| 77      | 3.2              | 13      | 40      | 13   | AML M6      | del20(q11.2) / ND        | CD34+33+117+13+HLA-DR+19+56+  | ND/ND       | Fig 6B           | 49        | 91            | ○             |
| 69      | 6.1              | 22      | 73      | 2    | AML M0      | Trisomy 9 / Neg          | CD34+33-117+13+HLA-DR+19-56-  | ND/ND       | S Fig 7A, Fig 6B | 42        | 84            | □             |
| 65      | 19.6             | 3       | 22      | 3    | AML M4      | Normal / Neg             | CD34-33+117+13+HLA-           | ITD/Yes     | S Fig 7A, Fig 6B | 67        | 99            | △             |
| 62      | 3.3              | 4       | 30      | 9    | AML M2      | del9(q13a22) / ND        | CD34+33+117+13+HLA-DR+19-56-  | No/No       | S Fig 7A, Fig 6B | 50        | 88            | ◇             |
| 60      | 6.7              | 30      | 49      | 4    | AML 5A      | Complex / 11q23 abnl     | CD34-33+117+13-HLA-DR-19-56-  | No/ND       | S Fig 7A, Fig 6B | 41        | 100           | ▽             |
| 49      | 12.6             | 6       | 38      | 10   | AML MDS     | Trisomy 11 / ND          | CD34+33+117+13+HLA-DR+19-56-  | No/ND       | S Fig 7A, Fig 6B | 88        | 96            | ⬡             |
| 69      | 8.6              | <1%     | 15      | 10   | AML M5b     | Complex / HD             | CD34-33-117-13+HLA-DR+19-56+  | No/No       | Fig 6B           | 93        | 99            | ⊗             |

**Supplemental Table 2. AML patient characteristics for figures where primary AML blasts were utilized.** AML blasts from newly-diagnosed patients were used as targets (Figure 6A, B) and/or AML patient PBMC were used in functional assays as effector cells (Figure 6B, Supplemental Figure 7A). APL = Acute Promyelocytic Leukemia, RARA = Retinoic Acid Receptor Alpha, FLT3 = FMS-Like Tyrosine Kinase 3, ITD = Internal Tandem Duplication, NPM1 = nucleophosmin 1. ND = Not Done. NA = Not Applicable. For FLT3, the mutation is listed if positive. For immunophenotype, if a subset of blasts expressed the marker, partial expression is indicated (p). If FISH was performed, the relevant positive findings are listed, or Negative if none of (5q, 7q, +8, PML-RARA, CBFβ, ETO/AML) were identified. The fraction of blasts expressing HLA-E or HLA-A/B/C is indicated.

| UPN            | Age (years) | Gender | Status at Collection | Number of Prior Therapies | Most Recent Prior Therapy     | CD138+ HLA-E Percent Positive | Figure Symbol |
|----------------|-------------|--------|----------------------|---------------------------|-------------------------------|-------------------------------|---------------|
| 33718          | 67          | Female | New Diagnosis        | None                      | None                          | 78%                           | ○             |
| 67015          | 86          | Male   | New Diagnosis        | None                      | None                          | 90%                           | □             |
| 76440          | 74          | Male   | New Diagnosis        | None                      | None                          | 94%                           | △             |
| 14955          | 84          | Female | New Diagnosis        | None                      | None                          | 88%                           | ◇             |
| 87716 (CD138+) | 66          | Female | New Diagnosis        | None                      | None                          | 90%                           | NA            |
| 87716 (PBMC)   | 67          | Female | 100 Days Post-ASCT   | 1                         | 4 cycles RVD – Melphalan ASCT | ND                            | ▽             |

**Supplemental Table 3. In vitro multiple myeloma patient characteristics.** ASCT = autologous stem cell transplant, RVD = Revlimid, Velcade, Dexamethasone. ND, note done.

| Subject ID | Age (years) | Gender | Number of Prior Therapies | Response to Last Prior Therapy | ALT-803 Dose | Patient Group | Figure Symbol |
|------------|-------------|--------|---------------------------|--------------------------------|--------------|---------------|---------------|
| 027006     | 53          | Male   | 7                         | Refractory                     | 10mcg/kg SQ  | A             | △             |
| 027007     | 80          | Male   | 2                         | Refractory                     | 10mcg/kg SQ  | A             | ○             |
| 027002     | 55          | Male   | 4                         | Refractory                     | 3 mcg/kg IV  | B             | ◇             |
| 027003     | 57          | Male   | 4                         | Relapsed                       | 3 mcg/kg IV  | B             | □             |
| 027004     | 70          | Female | 3                         | Refractory                     | 6 mcg/kg IV  | B             | ▽             |

**Supplemental Table 4. In vivo multiple myeloma patient characteristics.**

| Source          | Antibody                                                                                                                                                                                                                                                                                   |
|-----------------|--------------------------------------------------------------------------------------------------------------------------------------------------------------------------------------------------------------------------------------------------------------------------------------------|
| Beckman Coulter | CD56 (N901), CD3 (UCHT1), CD45 (J.33), CD158b (CH-L), NKG2A (Z199.1), NKp46 (BAB281), CD158i (FES172)                                                                                                                                                                                      |
| BD Biosciences  | CD2 (RPA-2), CD11a (HI111), CD16 (3G8), IFN- $\gamma$ (B27), CD107a (H4A3), CD57(NK-1), CD69 (FN50), CD158a (HP3E4), CD158e (DX9), CD94 (HP-3D9), CD226 (DX11), CD137 (4-1BB), Perforin ( $\delta$ G9), Ki67, ERK1/2 (pT202,pY204), STAT5 (pY694), Akt (pS473)<br>Purified: CD2 (RPA-2.10) |
| Biolegend       | LFA-1 (m24)<br>Purified: NKG2D (1D11), CD11a/LFA-1 (HI111), NKp30 (P30-15), NKp44 (P44-8), TRAIL (RIK-2), IgG1 control (MG1-45)                                                                                                                                                            |
| Caltag          | Granzyme B (GB12)                                                                                                                                                                                                                                                                          |
| eBioscience     | CD244 (eBioDM244), TNF (MAb11)                                                                                                                                                                                                                                                             |
| Invitrogen      | Granzyme B (GB12)                                                                                                                                                                                                                                                                          |
| R & D Systems   | NKG2C (134591), NKp80 (239127), CD158d (181703), purified TRAIL/TNSF10, goat IgG Control                                                                                                                                                                                                   |

**Supplemental Table 5. List of anti-human mAbs.** The source of anti-human mAbs used is listed, with the clone indicated in parentheses.

A

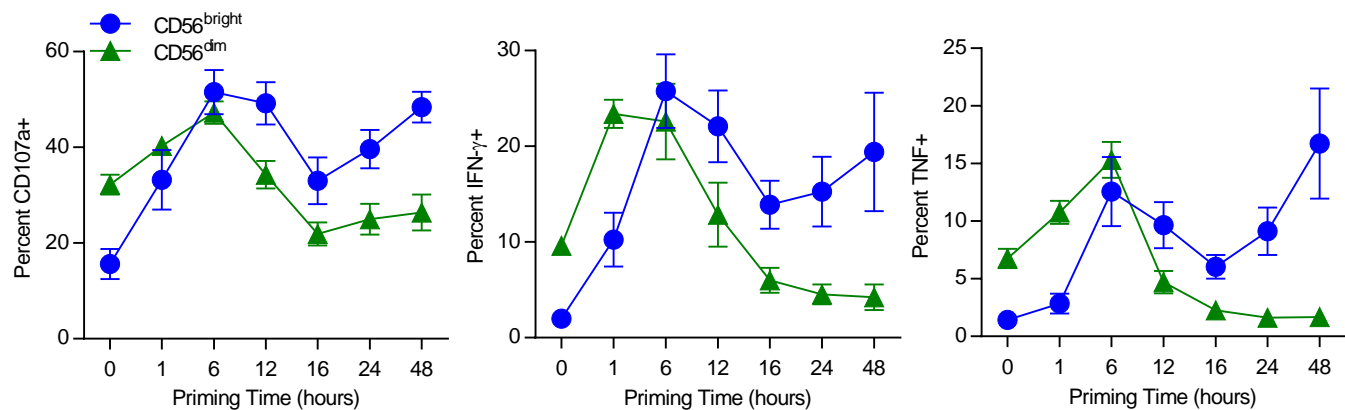

B

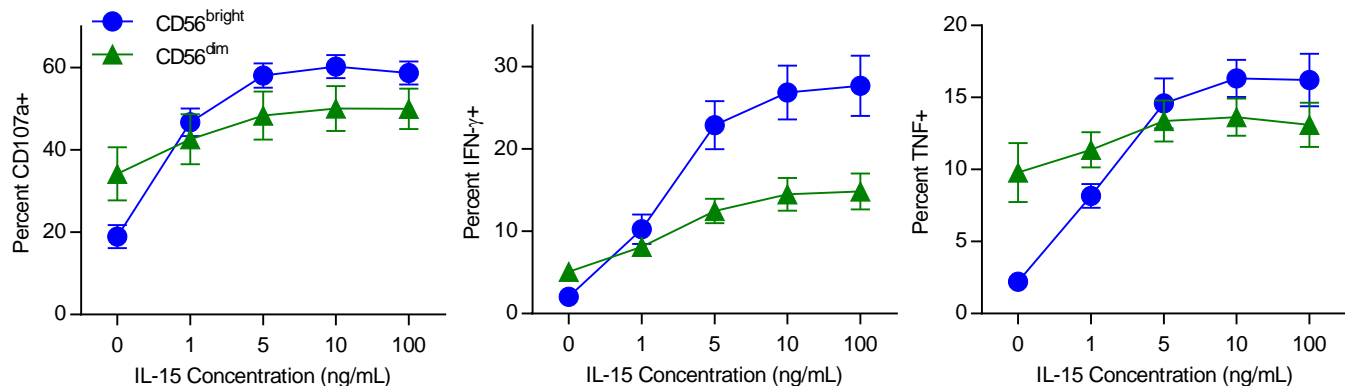

**Supplemental Figure 1. IL-15 priming occurs rapidly and at low concentrations of IL-15.** Time course and dose response of IL-15 priming of CD56<sup>bright</sup> NK cells. (A) Purified NK cells were primed with 5ng/mL IL-15 for 0, 1, 6, 12, 16, 24, or 48 hours then washed and incubated with K562 tumor targets for 6 hours at a 5:1 E:T ratio. (B) Purified NK cells were primed with 0, 1, 5, 10, or 100ng/mL IL-15 for 6 hours then washed and incubated with K562 tumor targets for 6 hours at a 5:1 E:T ratio. Line graphs show mean  $\pm$  SEM percentage of CD107a, IFN- $\gamma$ , or TNF positive CD56<sup>bright</sup> or CD56<sup>dim</sup> NK cells for each priming time or concentration. N=5-6 normal donors, 2-3 independent experiments.

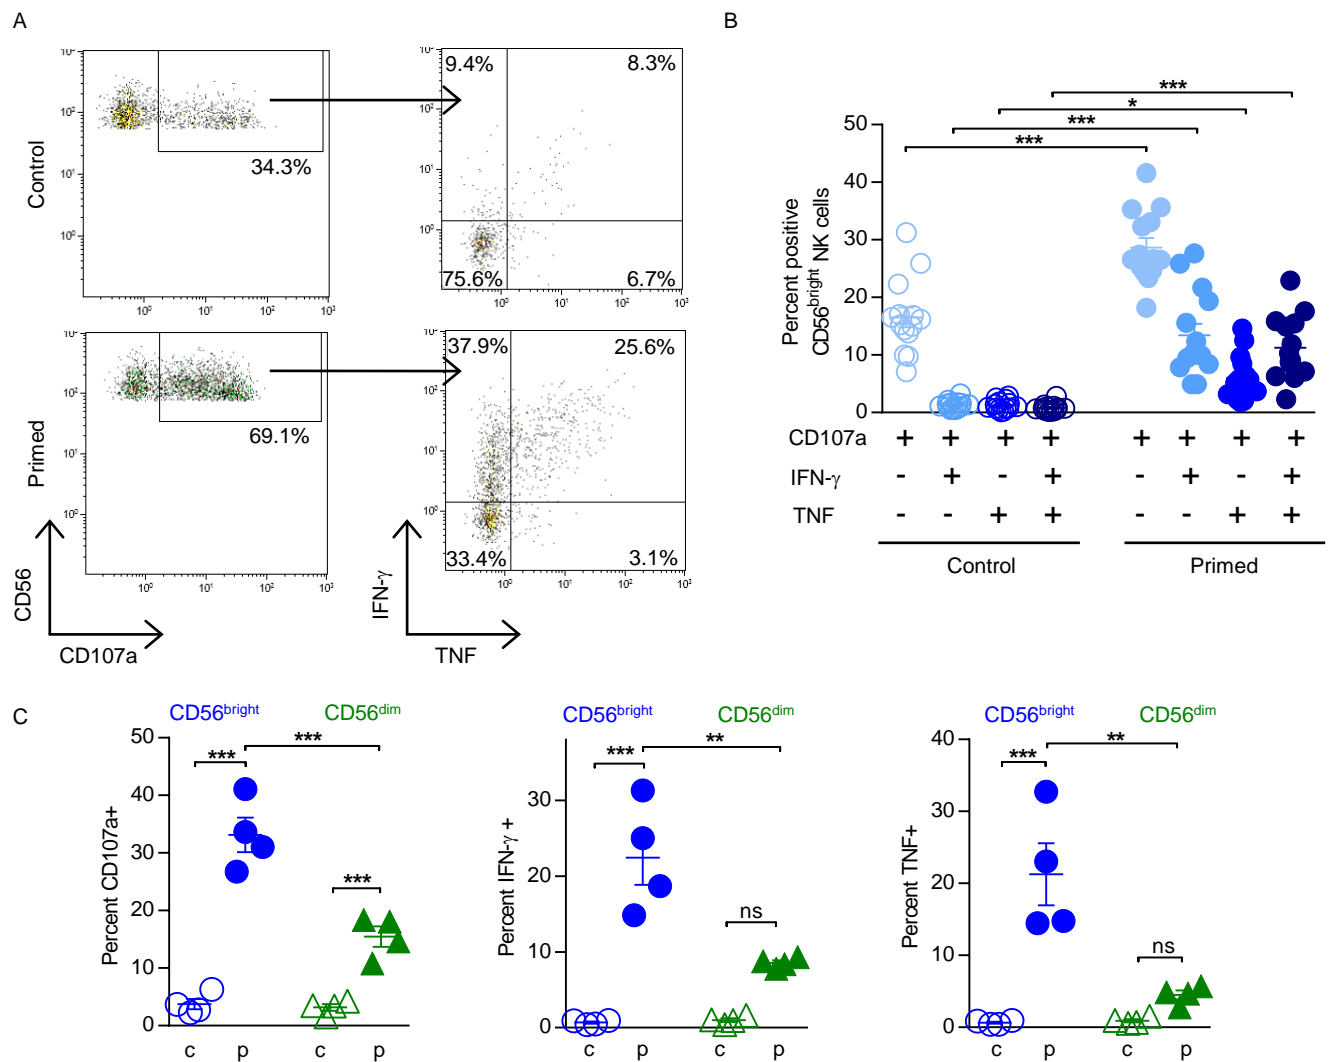

**Supplemental Figure 2. IL-15 primes human CD56<sup>bright</sup> NK cells for broad and polyfunctional responses to myeloid leukemia target cells.** Control (c) or IL-15-primed (p) purified NK cells were triggered with K562 tumor targets for 6 hours at a 5:1 E:T ratio and assessed for response polyfunctionality. (A) Representative flow cytometry plots show IFN- $\gamma$  and TNF expression in CD107a-positive control or primed CD56<sup>bright</sup> NK cells following triggering with K562 target cells. (B) Summary data show mean  $\pm$  SEM CD107a and/or IFN- $\gamma$  and/or TNF percent positive control or primed CD56<sup>bright</sup> NK cells. N=14 normal donors, 7 independent experiments. (C) Summary data show mean  $\pm$  SEM CD107a, IFN- $\gamma$ , or TNF positive control or primed CD56<sup>bright</sup> and CD56<sup>dim</sup> NK cells triggered with HL-60 AML targets. Data were compared using a one-way repeated measures ANOVA with Bonferroni's multiple comparisons testing of indicated groups.

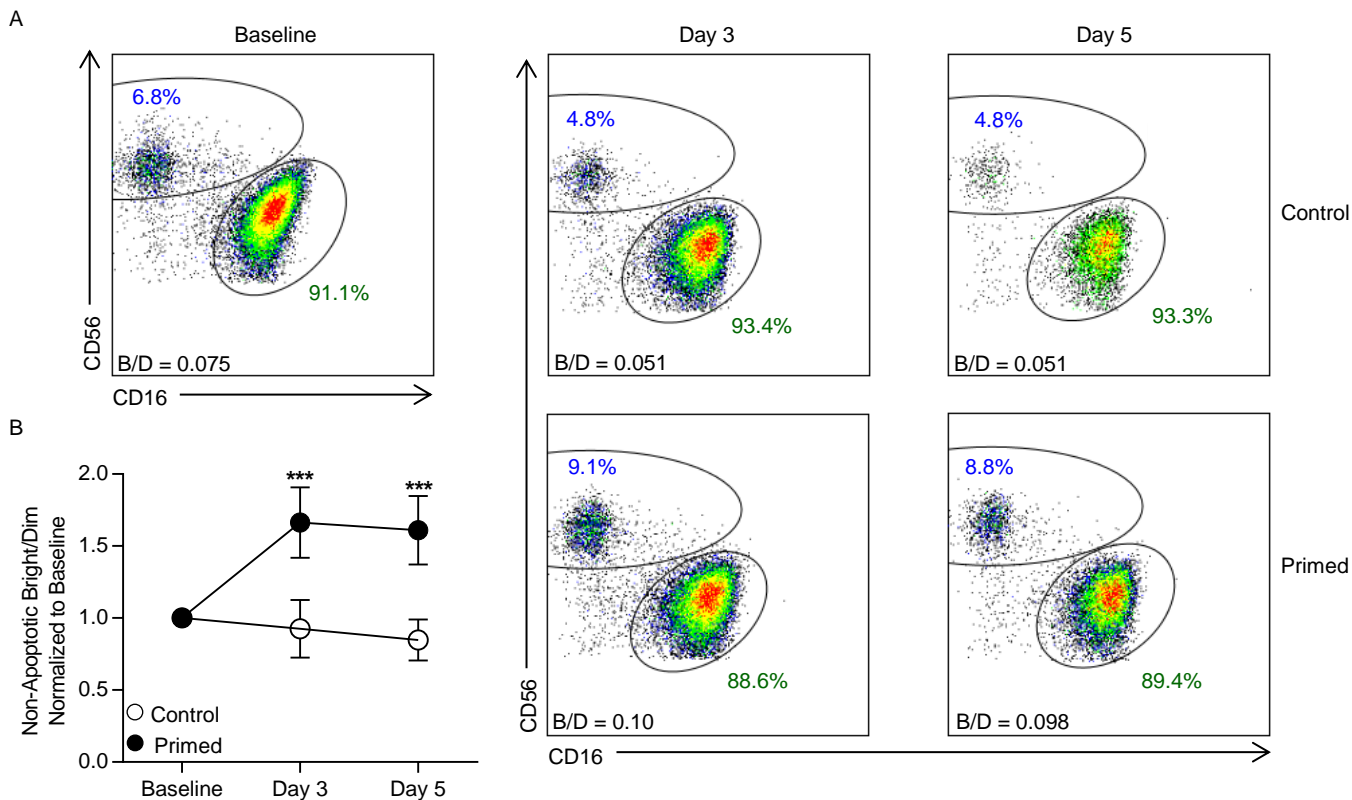

**Supplemental Figure 3. IL-15 priming selectively enhances CD56<sup>bright</sup> NK cell survival under cytokine-starved conditions.** Purified NK cells were incubated with media alone (control) or media with 5ng/mL IL-15 (primed) for 12-16h hours. Next, cytokines were washed away and cells were cultured in media alone for 3 or 5 additional days. After 3 or 5 days, cells were harvested and stained for NK cell surface markers as well as Annexin V and activated caspase 3/7 expression (indicating apoptosis). Non-apoptotic cells were Annexin V negative/activated caspase negative. The CD56<sup>bright</sup>/CD56<sup>dim</sup> NK cell ratio (B/D) of non-apoptotic NK cells was calculated at the time of purification, as well as at Day 3 or 5 of culture without cytokines. At the time of purification, cells were determined to be >97% viable via AO/PI staining. (A) Flow cytometric plots from a representative donor show CD56<sup>bright</sup> and CD56<sup>dim</sup> non-apoptotic control or primed NK cell percentages and ratio (B/D) at baseline or after 3 or 5 days of culture without cytokines. (B) Summary data show CD56<sup>bright</sup>/CD56<sup>dim</sup> ratio of control or IL-15-primed NK cells after 3 or 5 days of culture without cytokines, normalized to the ratio at baseline. N = 6 normal donors, 2 independent experiments. Data were compared using a 2-way repeated measures ANOVA, with Bonferroni's multiple comparisons testing.

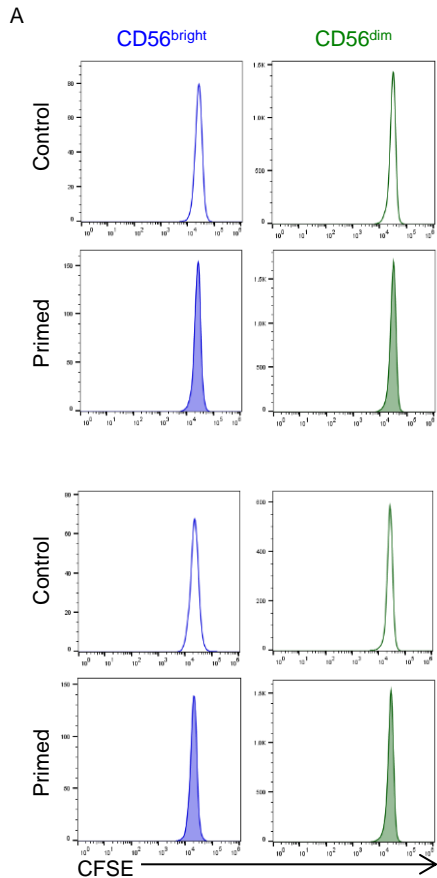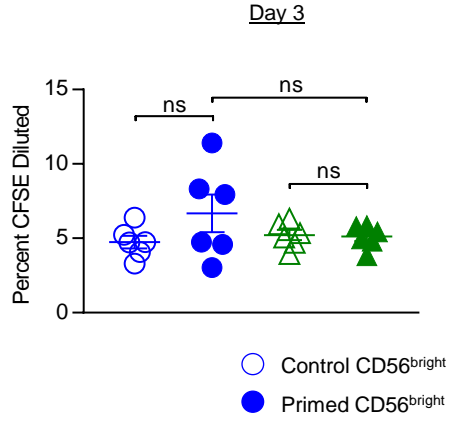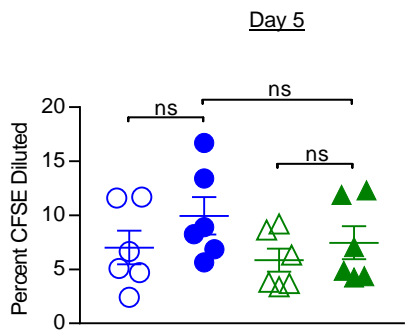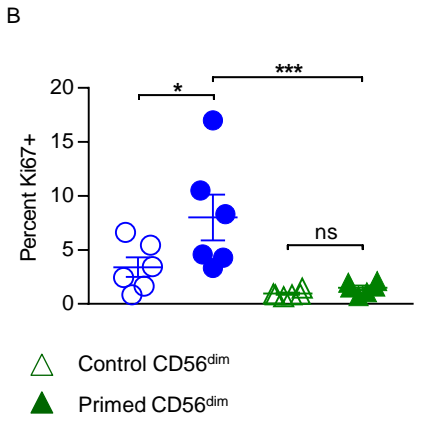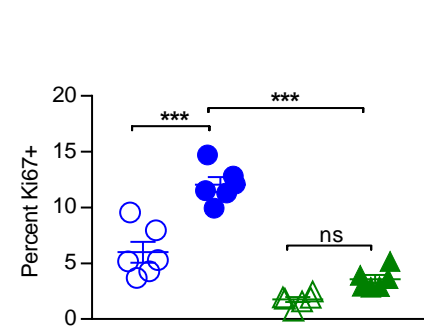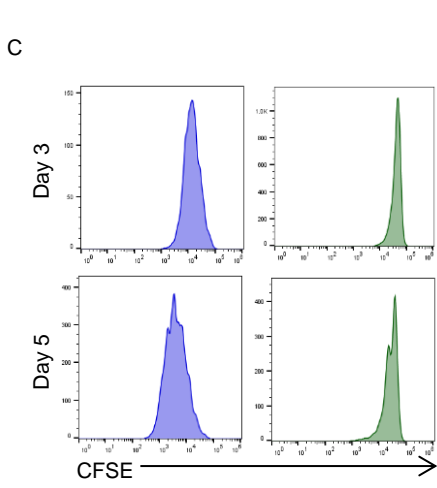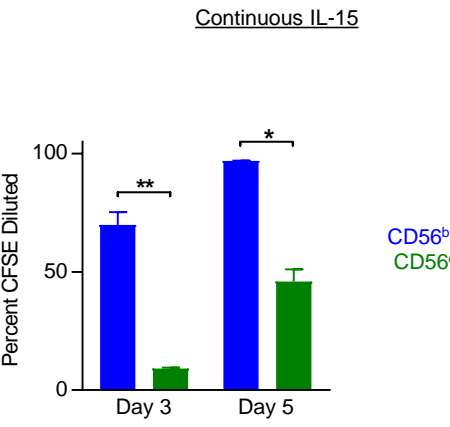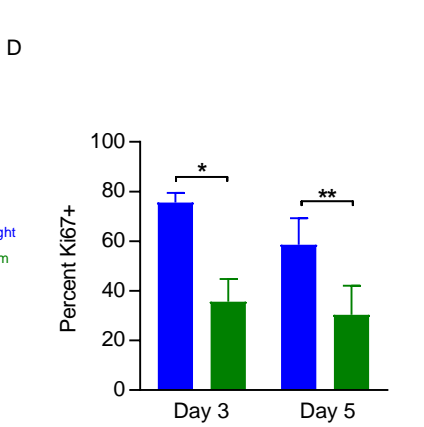

**Supplemental Figure 4. IL-15 priming does not result in robust CD56<sup>bright</sup> or CD56<sup>dim</sup> NK cell proliferation.** Purified, CFSE-labeled (A) or unlabeled NK cells (B) were incubated with 5ng/mL IL-15 (primed) or media alone (control) for 12-16h. Next, cytokines were washed away and cells were incubated in media alone for several days. Proliferation was assessed 3 and 5 days following cytokine wash-out via flow cytometric analysis of CFSE dilution (A) or intracellular Ki67 staining (B). (A) Representative flow histograms of CFSE dilution at Day 3 or 5 in control or primed NK cells. Summary data show percent of control or primed CD56<sup>bright</sup> and CD56<sup>dim</sup> NK cells that diluted CFSE (A) or express Ki67 (C) at the different time points. N=6 normal donors, 2 independent experiments. (C, D) A subset of donors were used to confirm that continuous culture in 5ng/mL IL-15 for 3 or 5 days induces proliferation (CFSE dilution) and Ki67 expression in CD56<sup>bright</sup> and CD56<sup>dim</sup> NK cells. Data were compared using a one-way repeated measures ANOVA with Bonferroni's multiple comparisons testing of indicated groups (A, B) or a paired student's t-test (C, D).



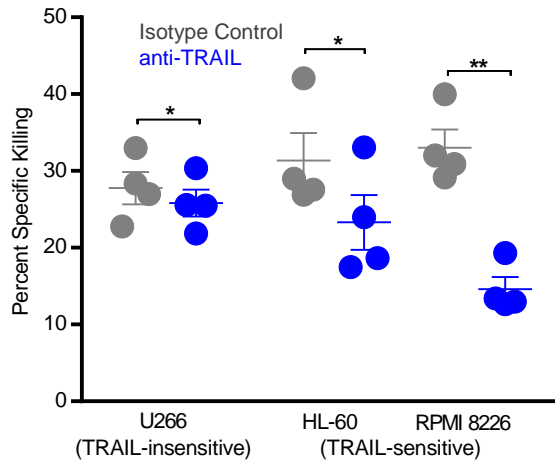

**Supplemental Figure 5. TRAIL contributes to IL-15-primed CD56<sup>bright</sup> NK cell killing of TRAIL-sensitive targets.** Flow-sorted, IL-15-primed CD56<sup>bright</sup> NK cells were triggered at a 5:1 E:T ratio with tumor target cell lines of differing TRAIL sensitivity in a 18 hour flow-based killing assay. Summary data shows mean  $\pm$  SEM percent specific killing by CD56<sup>bright</sup> NK cells in the presence of a TRAIL-neutralizing antibody or a isotype control antibody. N=4 normal donors, 2 independent experiments. Data were compared using a paired student's t-test.

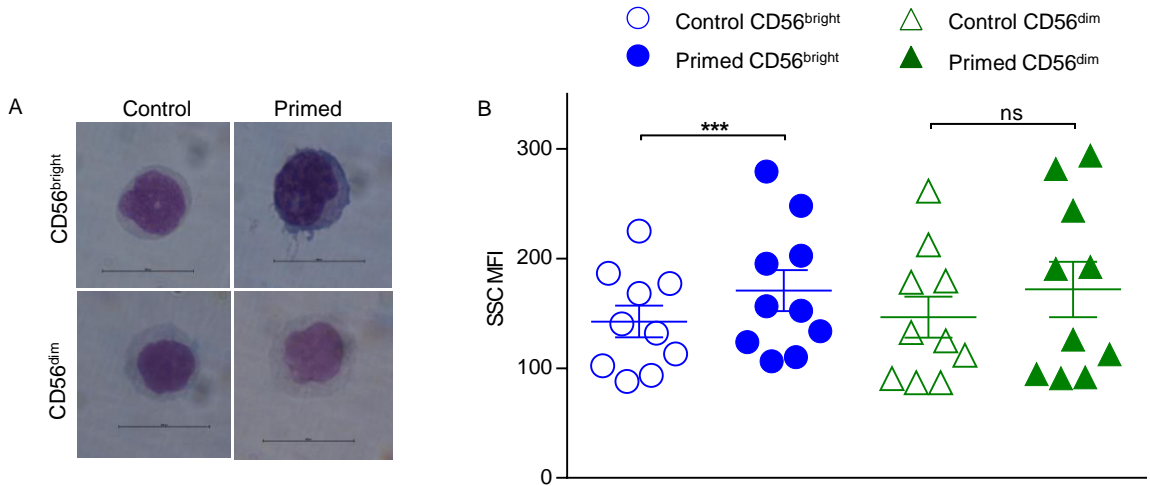

**Supplemental Figure 6. IL-15 priming enhances CD56<sup>bright</sup> NK cell granularity.** (A) Flow-sorted, control or primed CD56<sup>bright</sup> and CD56<sup>dim</sup> NK cells were Wright/Giemsa stained then evaluated with a light microscope (1000x). Representative cells are shown, demonstrating increased granularity of IL-15-primed CD56<sup>bright</sup> NK cells. (B) Summary data show mean  $\pm$  SEM side scatter (indicating cellular complexity/granularity) of control or primed CD56<sup>bright</sup> and CD56<sup>dim</sup> NK cells. N = 10 normal donors, 5 independent experiments. Data were compared using a paired student's t-test.

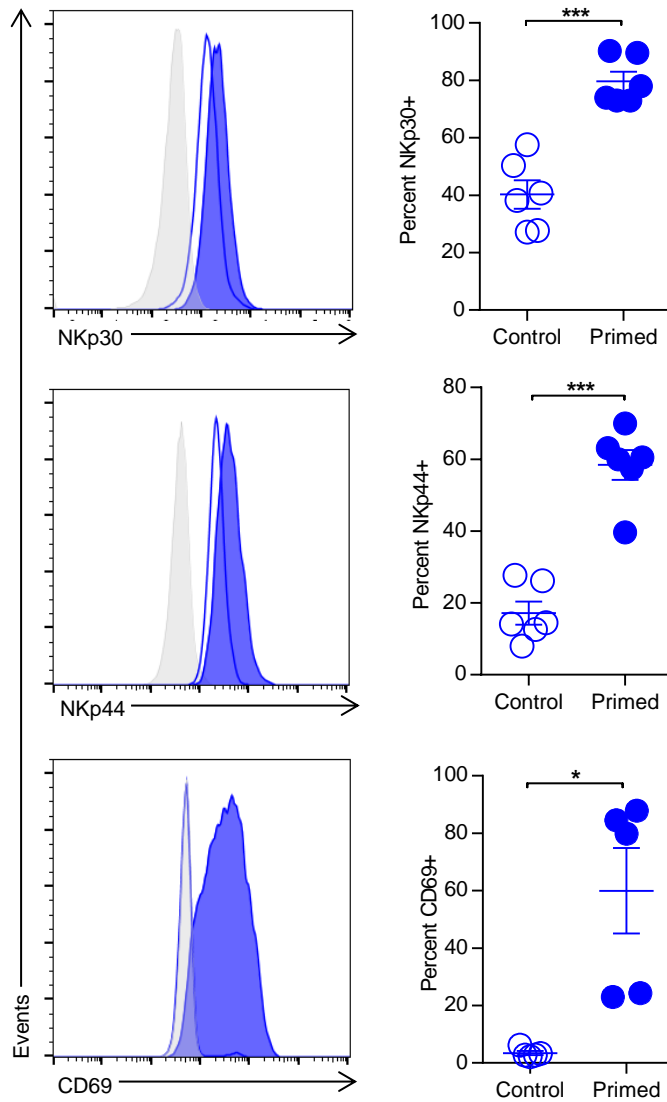

**Supplemental Figure 7. IL-15-primed CD56<sup>bright</sup> NK cells have increased NKp30, NKp44 and CD69 expression.** Control or primed purified NK cells were assessed for NKp30, NKp44 and CD69 expression using flow cytometry. Representative histogram plots gated on CD56<sup>bright</sup> NK cells show per cell expression of these markers, with grey histograms depicting unstained cells. Summary data show mean  $\pm$  SEM percentage positive CD56<sup>bright</sup> NK cells. N=5-6 normal donors, 2-3 independent experiments. Data were compared using a paired student's t-test.

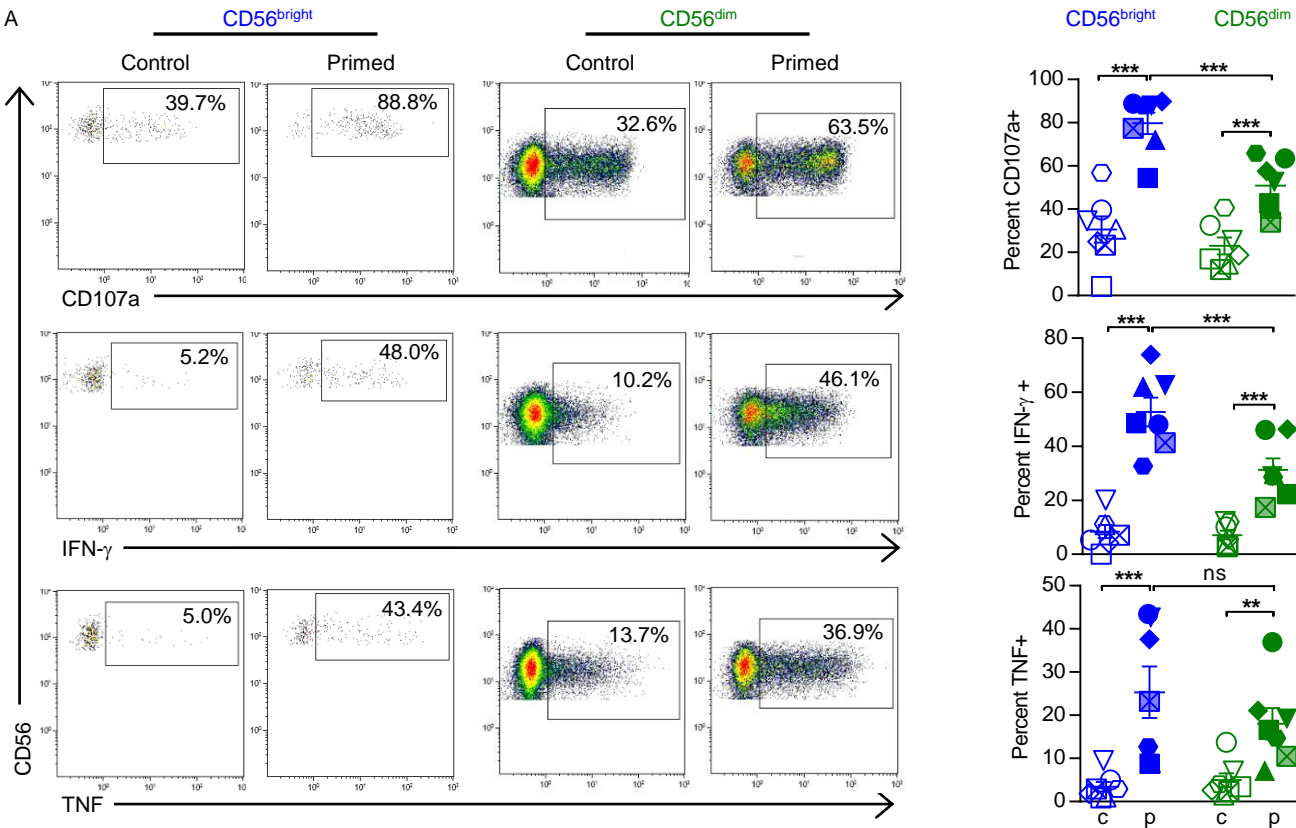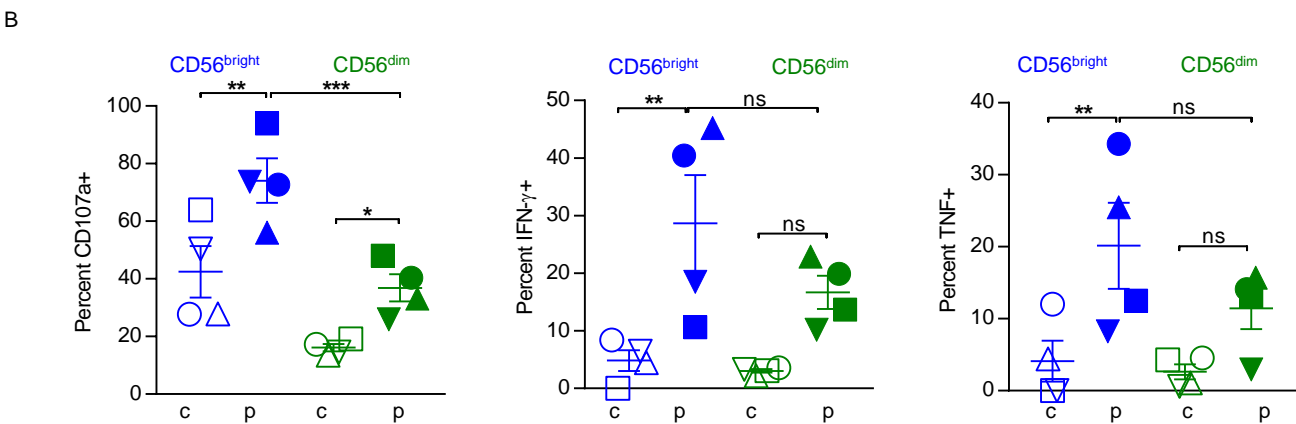

**Supplemental Figure 8. IL-15 primes CD56<sup>bright</sup> NK cells of patients with hematologic malignancies for enhanced functional responses to tumor cell lines.** (A) Control (c) or IL-15-primed (p) PBMC from newly diagnosed, untreated AML patients were triggered with K562 leukemia targets for 6 hours at a 5:1 E:T ratio. Bivariate flow plots show the percentage of control or primed CD56<sup>bright</sup> or CD56<sup>dim</sup> NK cells from a representative AML patient positive for CD107a, IFN- $\gamma$ , or TNF. Summary data show mean  $\pm$  SEM percentage CD107a, IFN- $\gamma$ , or TNF positive NK cells. N=7 patients, 5 independent experiments. (B) Control or IL-15-primed PBMC from newly-diagnosed, untreated multiple myeloma patients were triggered with U266 myeloma targets for 6 hours at a 5:1 E:T ratio. Summary data show mean  $\pm$  SEM percentage CD107a, IFN- $\gamma$ , or TNF positive NK cells. N=4 multiple myeloma patients, 4 independent experiments. Data were compared using a one-way repeated measures ANOVA with Bonferroni's multiple comparisons testing of indicated groups.

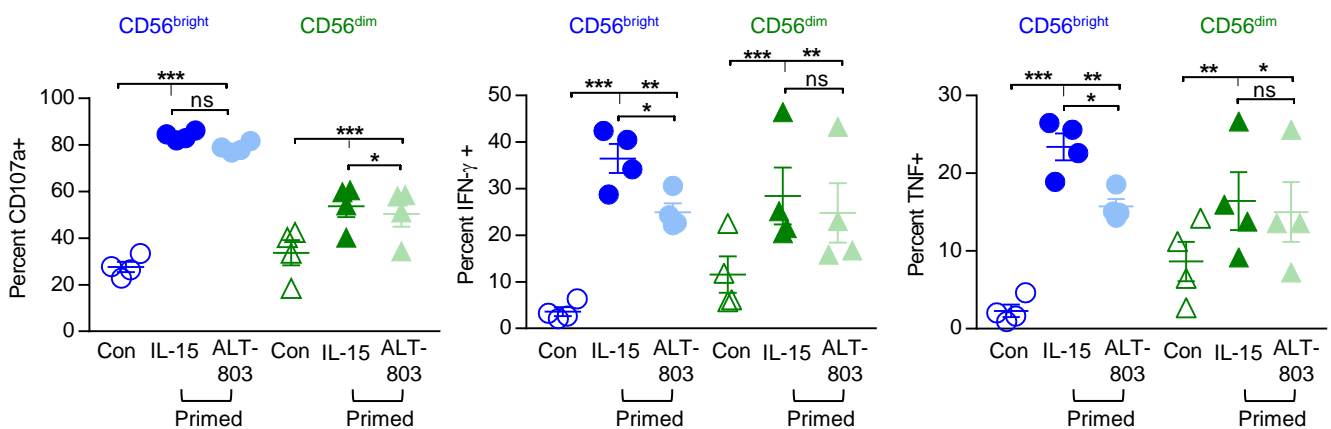

**Supplemental Figure 9. ALT-803 primes CD56<sup>bright</sup> NK cells for enhanced anti-tumor responses in vitro.** Purified normal donor NK cells were cultured in media alone (control; con), media with 5ng/mL rhIL-15, or media with 17.5ng/mL (equimolar to 5ng/mL rhIL-15) ALT-803 for 12-16 hours. Cells were then washed and co-incubated with K562 tumor targets at a 5:1 E:T ratio and functional responses assessed. Summary data show mean  $\pm$  SEM percentage CD107a, IFN- $\gamma$ , or TNF positive CD56<sup>bright</sup> or CD56<sup>dim</sup> NK cells. N=4 normal donors, 2 independent experiments. Data were compared using a one-way repeated measures ANOVA with Tukey's multiple comparisons testing

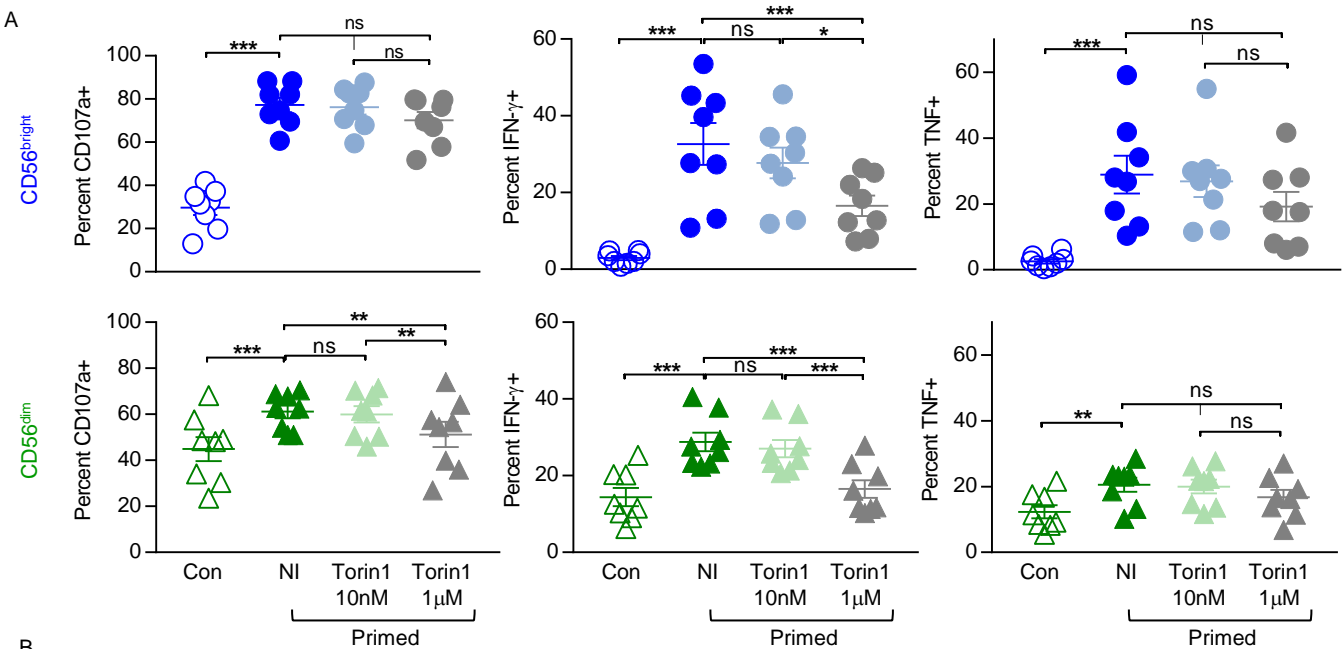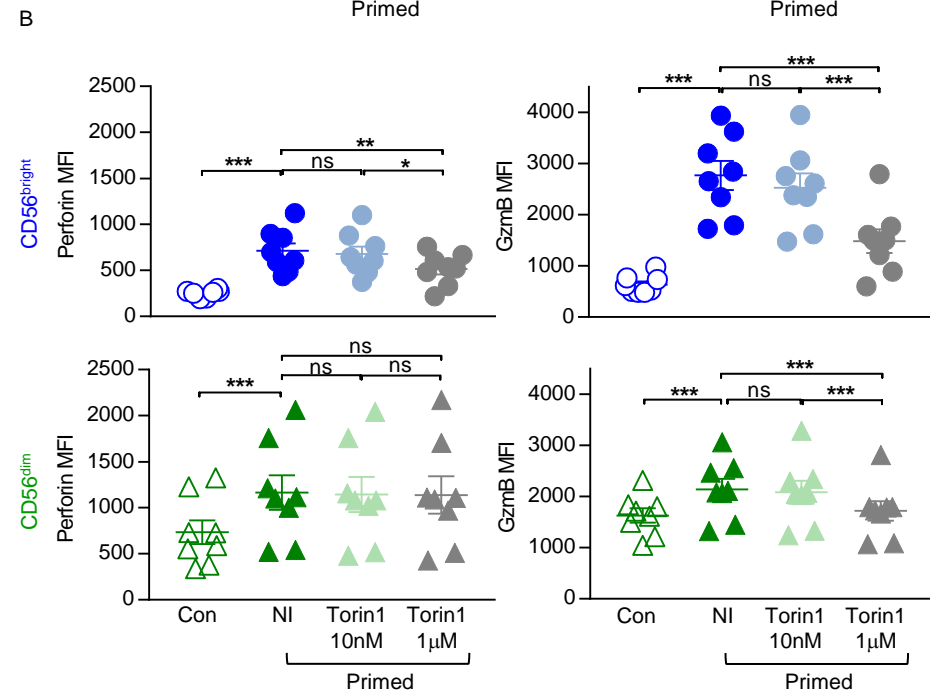

**Supplemental Figure 10. Selective mTOR blockade does not impede IL-15 priming of CD56<sup>bright</sup> or CD56<sup>dim</sup> NK cell anti-tumor responses.** Purified NK cells were incubated with no inhibitor (NI) or Torin1 at 10nM or 1 $\mu$ M for 1 hour prior to 12-16 hours of priming with IL-15. Control (con) cells were incubated in media alone. Next, cells were washed and (A) co-incubated with K562 tumor target cells to assess functional responses or (B) assessed via intracellular flow cytometry for cytotoxic protein expression levels. (A) Summary plots show mean  $\pm$  SEM percent of CD56<sup>bright</sup> or CD56<sup>dim</sup> NK cells positive for CD107a, IFN- $\gamma$ , or TNF following co-incubation with K562 targets. (B) Summary plots show mean  $\pm$  SEM perforin or granzyme B MFI in CD56<sup>bright</sup> and CD56<sup>dim</sup> NK cells. N=8 normal donors, 4 independent experiments. Data were compared using a one-way repeated measures ANOVA with Tukey's multiple comparisons testing.

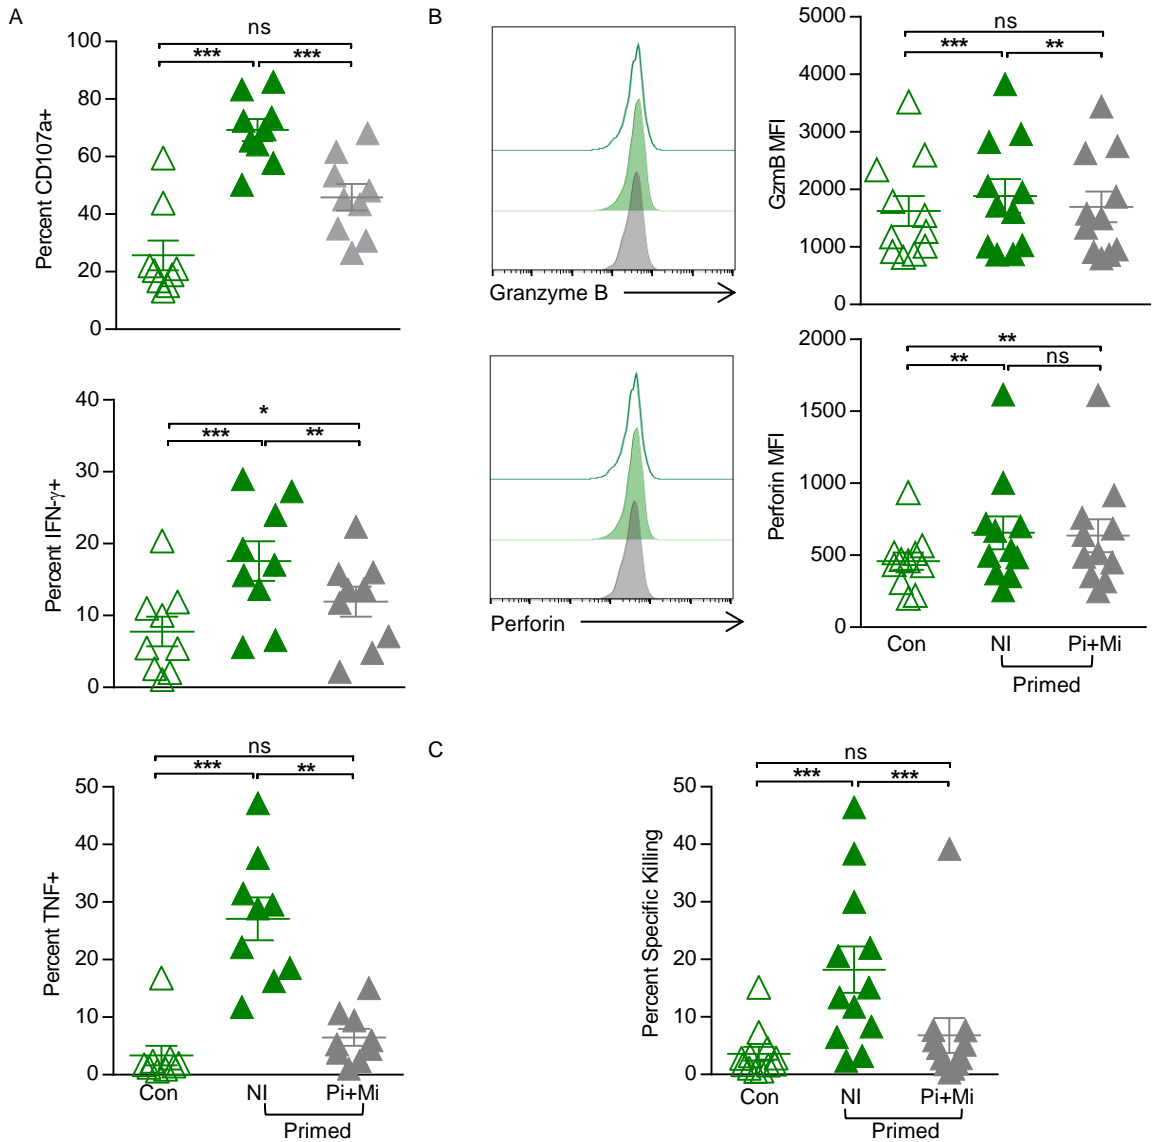

**Supplemental Figure 11. Combined PI3K/Akt/mTOR and Ras/Raf/MEK/ERK pathway blockade impairs flow-sorted, IL-15-primed CD56<sup>dim</sup> NK cell anti-tumor responses and cytotoxicity.** Flow-sorted CD56<sup>dim</sup> NK cells were cultured with or without (no inhibitor; NI) small molecule inhibitors of PI3K (Ly294002, Pi) and MEK (PD98059, Mi) for 1 hour prior to 12-16 hours of IL-15 priming. (A) CD56<sup>dim</sup> NK cells were then washed and incubated with K562 tumor targets for 6 hours at a 5:1 E:T ratio. Summary data show mean  $\pm$  SEM CD107a, IFN- $\gamma$ , or TNF percent positive cells. N=9 normal donors, 6 independent experiments. (B) CD56<sup>dim</sup> NK cells were assessed for granzyme B and perforin expression via intracellular flow cytometry. Representative histogram plots show per cell cytotoxic protein expression. Summary data show mean  $\pm$  SEM granzyme B or perforin MFI. N=11 normal donors, 6 independent experiments. (C) CD56<sup>dim</sup> NK cells were incubated with K562 tumor targets (E:T = 2.5:1) in a 4 hour flow-based killing assay. Summary data show mean  $\pm$  SEM percent specific killing. N=12 normal donors, 8 independent experiments. Data were compared using a one-way repeated measures ANOVA with Tukey's multiple comparisons testing.
